# Supplementary material
Source: PubMed Central journal article supplement (PMC7287950)
Supplement: jamadermatol-156-854-s001.pdf [file jamadermatol-156-854-s001.pdf]

## Supplementary Online Content

Penso L, Touvier M, Deschasaux M, et al. Association between adult acne and dietary behaviors: findings from the NutriNet-Santé prospective cohort study. *JAMA Dermatol*. Published online June 10, 2020. doi:10.1001/jamadermatol.2020.1602

**eMethods.** Methods Details

**eFigure.** Nutri-Net-Santé Design

**eTable 1.** Optional Acne Questionnaire Sent to the NutriNet Cohort in November 2018

**eTable 2.** Acne Status of the Study Population

**eTable 3.** Univariate Analyses of Dietary Patterns From a PCA Analysis of the Study Population, Using a Multinomial Logistic Regression

**eTable 4.** Multivariate Analyses of Food Exposure in the Subgroup of Women, Using a Multinomial Logistic Regression

**eTable 5.** Observational and Interventional Studies of the Association Between Diet and Acne Since 2005

**eReferences**

This supplementary material has been provided by the authors to give readers additional information about their work.

## eMethods. Methods Details

The Nutri-Net-Santé study is an ongoing, observational, web-based cohort, which aims to study the associations between nutrition and health. The cohort was launched in May 2009 by means of vast multimedia campaigns and recruited adults among the general population. Due to its design, participants are eligible if they have access to the internet where they can complete online self-questionnaires using a dedicated secure website (<https://www.etude-nutrinet-sante.fr/>). At baseline participants were asked to complete a set of 5 questionnaires regarding their diet, sociodemographic lifestyle (eg, sex, date of birth, educational level, smoking status), physical activity (7-day International Physical Activity Questionnaire [IPAQ]), anthropometric factors (eg, height, weight) and their health status. Inclusion in the cohort was completed at the end of the completion of this set of questionnaires. The same set of questionnaires was completed each year thereafter. In addition, participants were invited to fill each month complementary optional questionnaires related to determinants of dietary behavior and nutritional and health status. Finally, at inclusion and twice a year thereafter, participants were also invited to complete three nonconsecutive 24-h dietary records, which were randomly assigned over a 2-week period (two weekdays and one week-end day). Follow-up is insured by the online platform connected to their email address where they receive information about the study and questionnaire recalls. More details of the Nutri-Net-Santé study's rationale, design, and procedures have been previously published<sup>1, 2-4</sup>

### eFigure. Nutri-Net-Santé Design

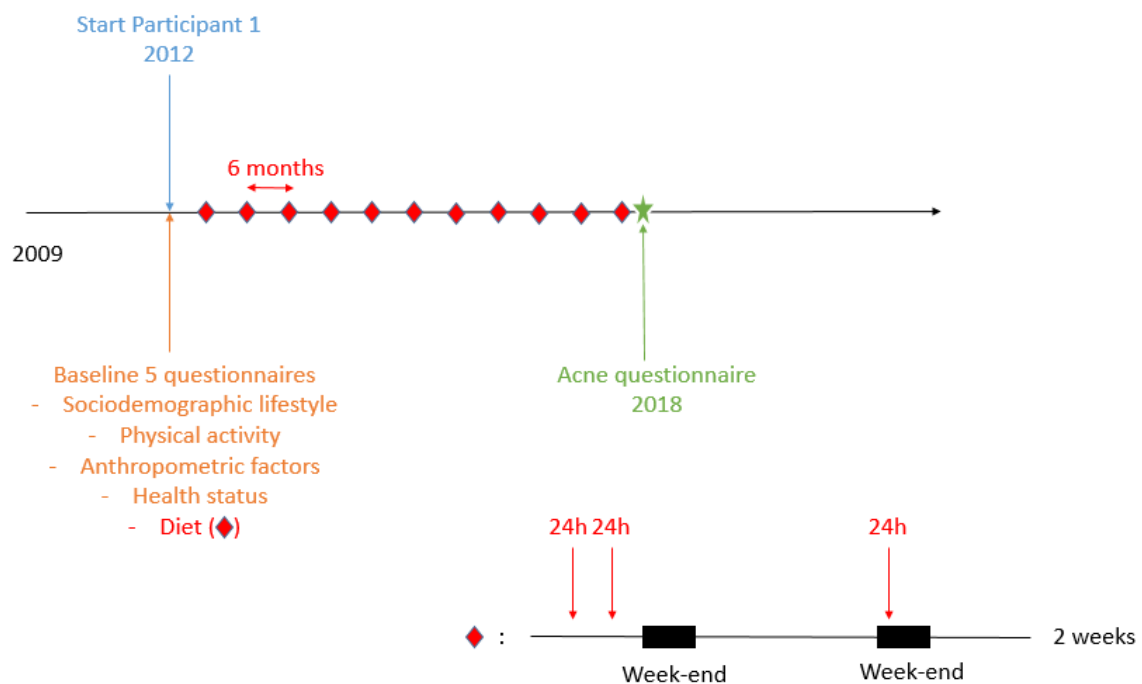

To illustrate how the variables were collected, we will take the example of Participant 1 which started the Nutri-Net-Santé e-cohort in 2012. At baseline Participant 1 had to complete a set of 5 questionnaires about his/her diet, sociodemographic lifestyle (eg, sex, date of birth, educational level, smoking status), physical activity (7-day International Physical Activity Questionnaire [IPAQ]), anthropometric factors (eg, height, weight) and his/her health status. Therefore, all these questionnaires have been completed in 2012, at the index date. The package of dietary records was proposed every 6 months, and was composed by three 24-hour dietary records randomly assigned over a two-week period (two weekdays and 1 weekend day). Since the acne questionnaire was administrated in 2018, Participant 1 had at least 12 (depending on the month he started) dietary record completed between his first-inclusion and the acne questionnaire. To be included in our cross-sectional study, Participant had to complete the acne questionnaire and had at least 3 pack of dietary records available before the acne questionnaire to have a minimum time of exposure of 1 year. The food/nutrient exposure was collected for each participant as the mean daily intake for each food and each nutrient. The mean daily energy intake was calculated and the number of dietary records was collected for adjustment.

eTable 1. Optional acne questionnaire sent to the NutriNet cohort in November 2018

| Questions                                                           | Response options                                                                                                                                                                                                                                |
|---------------------------------------------------------------------|-------------------------------------------------------------------------------------------------------------------------------------------------------------------------------------------------------------------------------------------------|
| Do you (or did you) current acne?                                   | Yes/No                                                                                                                                                                                                                                          |
| Your acne was diagnosed by:                                         | A dermatologist / Your general practitioner / Another physician or surgeon / Another healthcare professional (pharmacist, nurse, physiotherapist, midwife, naturopath, homeopathic practitioner, etc.) / Yourself (self-diagnosis) / Don't know |
| When did your acne appeared for the first time (approximately)?     | Before the age of 10 / Between 10 and 15 / 16 or 17 / After 18 years old / Don't know                                                                                                                                                           |
| Did you consult for your acne?                                      | Your general practitioner / A dermatologist in a consulting firm or in a private clinic / A health professional (pharmacist, nurse, physiotherapist, midwife, naturopath, homeopathic practitioner...) / Don't know                             |
| Have you been hospitalised for your acne?                           | Yes / No / Don't know                                                                                                                                                                                                                           |
| If so, how long after the appearance of acne were you hospitalized? | 1 year later / 2 years later /3 years later / 4 years later / Don't know                                                                                                                                                                        |

|                                                                                          |                                                                                                                                                                                            |
|------------------------------------------------------------------------------------------|--------------------------------------------------------------------------------------------------------------------------------------------------------------------------------------------|
| What types of treatment (if any) did you receive? (tick all that apply):                 | A cream or balm / tablets / injections / phototherapy (UV therapy administered by a physician) / Acupuncture, homeopathy, mesotherapy or another type of alternative medicine / Don't know |
| Is your acne present at the moment?                                                      | Yes / No / Don't know                                                                                                                                                                      |
| If it is no longer present, how old were you when your acne disappeared (approximately)? | Between 10 and 15 / 16 or 17 / 18 or over / Don't know                                                                                                                                     |
| At the moment, how would you rate the severity of your acne?                             | Not at all severe / Mild / Moderate / Severe / Don't know                                                                                                                                  |
| What impact does acne have on your daily life today                                      | No impact / Slight impact / Moderate impact / Major or very major impact / Don't know                                                                                                      |
| Do you think that your diet has or had an impact on your acne?                           | Yes / No / Don't know                                                                                                                                                                      |

eTable 2. Acne status of the study population

|                                                     | Participants with<br>past or current acne<br>n=11,324 (46%) |    | Missing data |    |
|-----------------------------------------------------|-------------------------------------------------------------|----|--------------|----|
|                                                     | N                                                           | %  | N            | %  |
| Diagnosed by a dermatologist                        | 4,200                                                       | 37 | 284          | 3  |
| Diagnosed by a physician other than a dermatologist | 1,830                                                       | 16 |              |    |
| Diagnosed by another healthcare professional        | 79                                                          | 1  |              |    |
| Self-diagnosis                                      | 4,931                                                       | 44 |              |    |
| Age at onset                                        |                                                             |    | 254          | 2  |
| Before 10                                           | 90                                                          | 1  |              |    |
| Between 10 and 15                                   | 7,087                                                       | 63 |              |    |
| 16 or 17                                            | 3,109                                                       | 27 |              |    |
| 18 or over                                          | 784                                                         | 7  |              |    |
| Previous hospitalization for acne                   | 18                                                          | 0  | 20           | 0  |
| Treatments with creams or balms                     | 9,822                                                       | 87 | 3800         | 34 |
| Systemic treatments                                 | 3,491                                                       | 31 | 3800         | 34 |

|                                                                  |      |    |      |    |
|------------------------------------------------------------------|------|----|------|----|
| Other treatments: alternative medicine                           | 606  | 5  | 3800 | 34 |
| Acne present when the questionnaire was filled out               | 1762 | 16 | 130  | 1  |
| Diet considered to have an impact on acne                        | 3576 | 32 | 4195 | 37 |
| Age at resolution (in the “past acne” group, n=9562)             |      |    | 465  | 5  |
| Between 10 and 15                                                | 256  | 3  |      |    |
| 16 or 17                                                         | 2310 | 24 |      |    |
| 18 or over                                                       | 6531 | 68 |      |    |
| <i>Abbreviations: N = number of participants; % = percentage</i> |      |    |      |    |

eTable 3. Univariate analyses of dietary patterns from a PCA analysis of the study population, using a multinomial logistic regression

|                                                  | Univariate analyses (vs. never acne) |       |      |                            |                              |       |      |                            |
|--------------------------------------------------|--------------------------------------|-------|------|----------------------------|------------------------------|-------|------|----------------------------|
|                                                  | n=13,128 (54%)                       |       |      |                            |                              |       |      |                            |
|                                                  | Past acne<br>n=9,562 (39%)           |       |      |                            | Current acne<br>n=1,762 (7%) |       |      |                            |
|                                                  | OR                                   | 95CI% |      | p-value                    | OR                           | 95CI% |      | p-value                    |
| Factor 1: "Healthy"                              | 0.86                                 | 0.83  | 0.88 | <b>&lt;10<sup>-4</sup></b> | 0.55                         | 0.52  | 0.57 | <b>&lt;10<sup>-4</sup></b> |
| Factor 2: "Fatty & sweet"                        | 1.14                                 | 1.11  | 1.17 | <b>&lt;10<sup>-4</sup></b> | 1.25                         | 1.20  | 1.30 | <b>&lt;10<sup>-4</sup></b> |
| Factor 3: "Animal products and refined cereals " | 0.98                                 | 0.95  | 1.01 | 0.125                      | 0.92                         | 0.88  | 0.97 | <b>0.002</b>               |

OR: odds ratio; CI: confidence interval.

Statistically significant p-values (<0.05 in a chi-squared test) are given in bold type.



| eTable 4. Multivariate analyses of food exposure in the subgroup of women, using a multinomial logistic regression |                                                      |       |      |         |                              |       |      |              |
|--------------------------------------------------------------------------------------------------------------------|------------------------------------------------------|-------|------|---------|------------------------------|-------|------|--------------|
|                                                                                                                    | Multivariate analyses (vs. never acne) n=6,998 (52%) |       |      |         |                              |       |      |              |
|                                                                                                                    | Past acne<br>n=5,435 (40%)                           |       |      |         | Current acne<br>n=1,105 (8%) |       |      |              |
|                                                                                                                    | OR                                                   | 95CI% |      | p-value | OR                           | 95CI% |      | p-value      |
| Meat (portions/day)                                                                                                | 0.88                                                 | 0.74  | 1.05 | 0.161   | 0.71                         | 0.51  | 0.99 | <b>0.042</b> |
| Fish (portions/day)                                                                                                | 1.05                                                 | 0.87  | 1.26 | 0.642   | 1.09                         | 0.75  | 1.59 | 0.666        |
| Vegetables (portions/day)                                                                                          | 1.03                                                 | 0.98  | 1.08 | 0.313   | 0.92                         | 0.83  | 1.01 | 0.078        |
| Fruit (portions/day)                                                                                               | 0.98                                                 | 0.95  | 1.02 | 0.389   | 0.99                         | 0.92  | 1.06 | 0.685        |
| Milk (glasses/day)                                                                                                 | 1.02                                                 | 0.95  | 1.10 | 0.551   | 1.16                         | 1.02  | 1.31 | <b>0.028</b> |
| Sweet beverages (glasses/day)                                                                                      | 0.87                                                 | 0.74  | 1.02 | 0.077   | 1.12                         | 0.91  | 1.38 | 0.284        |
| Dark chocolate (chunks/day)                                                                                        | 1.02                                                 | 0.97  | 1.07 | 0.427   | 1.06                         | 0.97  | 1.17 | 0.204        |
| Milk chocolate (chunks/day)                                                                                        | 1.02                                                 | 0.94  | 1.10 | 0.697   | 1.02                         | 0.90  | 1.16 | 0.761        |
| Snacks and fast foods (portions/day)                                                                               | 1.13                                                 | 0.96  | 1.32 | 0.136   | 1.28                         | 1.00  | 1.65 | <b>0.048</b> |
| Fatty and sugary products (portions/day)                                                                           | 1.20                                                 | 0.92  | 1.57 | 0.176   | 1.51                         | 0.98  | 2.33 | 0.060        |
| Refined cereals (portions/day)                                                                                     | 1.07                                                 | 0.99  | 1.15 | 0.071   | 1.08                         | 0.94  | 1.24 | 0.280        |

Details:

One portion of meat, fish, fruit, vegetables, snacks & fast foods, fatty & sugary products, and refined cereals: 100 grams.

One glass of milk or sugary beverage: 200 millilitres.

One chunk of chocolate: 7 grams.

One slice of deli meat: 40 grams.

P-values were obtained in a multinomial logistic regression after adjustment for total calorie intake, the number of dietary records completed, sex, age, smoking status, physical activity, educational level, *BMI, medical history of cancer, diabetes or cardiovascular disease, age at menarche, pregnancy, menopause* and depressive symptoms).

Statistically significant p-values (<0.05) are given in bold type. OR: odds ratio; CI: confidence interval

| eTable 5. Observational and interventional studies of the association between diet and acne since 2005 |             |                  |                                    |                                                                 |                          |                     |                        |                                                                                           |                                                          |
|--------------------------------------------------------------------------------------------------------|-------------|------------------|------------------------------------|-----------------------------------------------------------------|--------------------------|---------------------|------------------------|-------------------------------------------------------------------------------------------|----------------------------------------------------------|
| <u>References</u>                                                                                      | <u>Year</u> | <u>Country</u>   | <u>Study design</u>                | <u>Population</u>                                               | <u>Total N</u>           | <u>Study length</u> | <u>Acne assessment</u> | <u>Exposition</u>                                                                         | <u>Association found</u>                                 |
| <u>Adebamowo et al.<sup>5</sup></u>                                                                    | <u>2005</u> | <u>USA</u>       | <u>Cross-sectional</u>             | <u>Female from "Nurses Health II" about their teenage years</u> | <u>45,355</u>            | <u>NA</u>           | <u>Physician</u>       | <u>Dairy products</u>                                                                     | <u>±</u>                                                 |
| <u>Adebamowo et al.<sup>6</sup></u>                                                                    | <u>2006</u> | <u>USA</u>       | <u>Cohort</u>                      | <u>Female (9-15 yo)</u>                                         | <u>6,094</u>             | <u>∅</u>            | <u>Self-reported</u>   | <u>Dairy products</u>                                                                     | <u>±</u>                                                 |
| <u>Kaymak et al.<sup>7</sup></u>                                                                       | <u>2007</u> | <u>Turkey</u>    | <u>Case-control</u>                | <u>Male, female (19 - 34 yo)</u>                                | <u>91 (49 cases)</u>     | <u>NA</u>           | <u>Clinical exam</u>   | <u>Glycemic charge</u>                                                                    | <u>=</u>                                                 |
| <u>Smith et al.<sup>8</sup></u>                                                                        | <u>2007</u> | <u>Australia</u> | <u>Interventional (randomised)</u> | <u>Male (15 - 25 yo)</u>                                        | <u>54 (27 exposed)</u>   | <u>12 weeks</u>     | <u>Dermatologist</u>   | <u>Low glycemic load diet</u>                                                             | <u>=</u>                                                 |
| <u>Adebamowo et al.<sup>9</sup></u>                                                                    | <u>2008</u> | <u>USA</u>       | <u>Cohort</u>                      | <u>Male (9-15 yo)</u>                                           | <u>4,273</u>             | <u>∅</u>            | <u>Self-reported</u>   | <u>Dairy products</u>                                                                     | <u>±</u>                                                 |
| <u>Ghodsi et al.<sup>10</sup></u>                                                                      | <u>2009</u> | <u>Iran</u>      | <u>Cross-sectional</u>             | <u>Male, female (12 - 20 yo)</u>                                | <u>1,002 (933 cases)</u> | <u>NA</u>           | <u>Dermatologist</u>   | <u>Sweets</u><br><u>Nuts</u><br><u>Chocolate</u><br><u>Oily food</u><br><u>Spicy food</u> | <u>±</u><br><u>±</u><br><u>±</u><br><u>±</u><br><u>0</u> |
| <u>Kim et al.<sup>11</sup></u>                                                                         | <u>2010</u> | <u>Korea</u>     | <u>Interventional</u>              | <u>Male, female (18 - 30 yo)</u>                                | <u>36 (18 exposed)</u>   | <u>12 weeks</u>     | <u>Dermatologist</u>   | <u>Lactoferrin-enriched</u>                                                               | <u>=</u>                                                 |

|                                      |                        |                  |                        |                                        |                                   |                |                      |                                                                                                                                                                                                     |                                                          |
|--------------------------------------|------------------------|------------------|------------------------|----------------------------------------|-----------------------------------|----------------|----------------------|-----------------------------------------------------------------------------------------------------------------------------------------------------------------------------------------------------|----------------------------------------------------------|
|                                      |                        |                  | (randomised)           |                                        |                                   |                |                      | fermented milk                                                                                                                                                                                      |                                                          |
| <u>Reynolds et al.</u> <sup>12</sup> | <u>20</u><br><u>10</u> | <u>Australia</u> | <u>Interventional</u>  | <u>Male (mean age ± SD, 17 ± 1 yo)</u> | <u>43 (23 low GI; 20 high GI)</u> | <u>8 weeks</u> | <u>Dermatologist</u> | <u>Low glycemic index diet vs. High glycemic index diet</u>                                                                                                                                         | <u>0</u>                                                 |
| <u>Aksu et al.</u> <sup>13</sup>     | <u>20</u><br><u>11</u> | <u>Turkey</u>    | <u>Cross-sectional</u> | <u>Male, female (13 - 18 yo)</u>       | <u>2,300 (1,353 cases)</u>        | <u>NA</u>      | <u>Self-reported</u> | <u>Unhealthy fruits and vegetables intake</u><br><u>Unhealthy sugar intake</u><br><u>Unhealthy fat intake</u><br><u>Frequent sausages, burgers intake</u><br><u>Frequent pastries, cakes intake</u> | <u>0</u><br><u>±</u><br><u>±</u><br><u>±</u><br><u>±</u> |
| <u>Block et al.</u> <sup>14</sup>    | <u>20</u><br><u>11</u> | <u>USA</u>       | <u>Interventional</u>  | <u>Male (18 - 35 yo)</u>               | <u>10</u>                         | <u>7 days</u>  | <u>Ø</u>             | <u>Chocolate</u>                                                                                                                                                                                    | <u>±</u>                                                 |

|                                       |                        |                 |                                    |                                  |                        |                 |                      |                                                                                                                                                                                         |                                                                                              |
|---------------------------------------|------------------------|-----------------|------------------------------------|----------------------------------|------------------------|-----------------|----------------------|-----------------------------------------------------------------------------------------------------------------------------------------------------------------------------------------|----------------------------------------------------------------------------------------------|
| <u>Di Landro et al.</u> <sup>15</sup> | <u>20</u><br><u>12</u> | <u>Italy</u>    | <u>Case-control</u>                | <u>Male, female (10 - 24 yo)</u> | <u>563 (205 cases)</u> | <u>NA</u>       | <u>Dermatologist</u> | <u>Milk</u><br><u>Cheese/Yogurt</u><br><u>Bread/Pasta</u><br><u>Cakes/Sweets</u><br><u>Chocolate</u><br><u>Fruits/Vegetables</u><br><u>Fish</u><br><u>Red meat</u><br><u>Ham/Salami</u> | <u>+</u><br><u>0</u><br><u>0</u><br><u>0</u><br><u>0</u><br><u>=</u><br><u>0</u><br><u>0</u> |
| <u>Ismail et al.</u> <sup>16</sup>    | <u>20</u><br><u>12</u> | <u>Malaysia</u> | <u>Case-control</u>                | <u>Male, female (18 - 30 yo)</u> | <u>88 (44 cases)</u>   | <u>NA</u>       | <u>Dermatologist</u> | <u>Glycemic load</u><br><u>Milk</u>                                                                                                                                                     | <u>+</u><br><u>+</u>                                                                         |
| <u>Kwon et al.</u> <sup>17</sup>      | <u>20</u><br><u>12</u> | <u>Korea</u>    | <u>Interventional (randomised)</u> | <u>Male, female (20 - 27 yo)</u> | <u>32 (17 exposed)</u> | <u>10 weeks</u> | <u>Dermatologist</u> | <u>Low glycemic load diet</u>                                                                                                                                                           | <u>=</u>                                                                                     |
| <u>Salomone et al.</u> <sup>18</sup>  | <u>20</u><br><u>12</u> | <u>India</u>    | <u>Case-control</u>                | <u>Male, female (13 - 25 yo)</u> | <u>80 (40 cases)</u>   | <u>NA</u>       | <u>Ø</u>             | <u>Ice cream ingestion</u><br><u>Juices with sugar</u><br><u>Carbonated drinks</u><br><u>Milk</u><br><u>Bread</u><br><u>White rice</u><br><u>Lower consumption</u>                      | <u>+</u><br><u>+</u><br><u>0</u><br><u>+</u><br><u>+</u><br><u>0</u><br><u>0</u><br><u>=</u> |

|                                          |                        |                 |                                    |                                  |                            |                 |                      |                                                                                                                        |                                                          |
|------------------------------------------|------------------------|-----------------|------------------------------------|----------------------------------|----------------------------|-----------------|----------------------|------------------------------------------------------------------------------------------------------------------------|----------------------------------------------------------|
|                                          |                        |                 |                                    |                                  |                            |                 |                      | <u>of fruits</u><br><u>Lower</u><br><u>consumption</u><br><u>of vegetables</u>                                         |                                                          |
| <u>Wolkenstein et al.</u> <sup>19</sup>  | <u>20</u><br><u>14</u> | <u>France</u>   | <u>Cross-sectional</u>             | <u>Male, Female (15 - 24 yo)</u> | <u>2,266 (1,375 cases)</u> | <u>NA</u>       | <u>Self-reported</u> | <u>Alcohol</u><br><u>Sugary fizzy drink</u><br><u>Fast food</u><br><u>Dairy product</u><br><u>Sweets and chocolate</u> | <u>0</u><br><u>0</u><br><u>0</u><br><u>+</u><br><u>-</u> |
| <u>Caperton et al.</u> <sup>20</sup>     | <u>20</u><br><u>14</u> | <u>USA</u>      | <u>Interventional (randomised)</u> | <u>Male (18 - 35 yo)</u>         | <u>13</u>                  | <u>7 days</u>   | <u>Ø</u>             | <u>Chocolate</u>                                                                                                       | <u>+</u>                                                 |
| <u>Cao et al.</u> <sup>21</sup>          | <u>20</u><br><u>15</u> | <u>Many</u>     | <u>Meta-analysis</u>               | <u>2 articles (15 - 27 yo)</u>   | <u>75 (44 exposed)</u>     | <u>12 weeks</u> | <u>Dermatologist</u> | <u>Low glycemic load diet</u>                                                                                          | <u>=</u>                                                 |
| <u>El Darouti et al.</u> <sup>22</sup>   | <u>20</u><br><u>15</u> | <u>Egypt</u>    | <u>Case-control</u>                | <u>Male, female (14 - 36 yo)</u> | <u>400 (200 cases)</u>     | <u>NA</u>       | <u>Dermatologist</u> | <u>Salty food</u><br><u>Spicy food</u>                                                                                 | <u>+</u><br><u>0</u>                                     |
| <u>Vongraviopap et al.</u> <sup>23</sup> | <u>20</u><br><u>15</u> | <u>Thailand</u> | <u>Interventional</u>              | <u>Male, (18 - 25 yo)</u>        | <u>25</u>                  | <u>4 weeks</u>  | <u>Dermatologist</u> | <u>Chocolate</u>                                                                                                       | <u>+</u>                                                 |

|                                       |                        |                |                                    |                                                                    |                                       |           |                      |                                                                                                                                                                                       |                                                                                                                      |
|---------------------------------------|------------------------|----------------|------------------------------------|--------------------------------------------------------------------|---------------------------------------|-----------|----------------------|---------------------------------------------------------------------------------------------------------------------------------------------------------------------------------------|----------------------------------------------------------------------------------------------------------------------|
| <u>Okoro et al.</u> <sup>24</sup>     | <u>20</u><br><u>16</u> | <u>Nigeria</u> | <u>Cross-sectional</u>             | <u>Male, female</u><br><u>(mean age ± SD,</u><br><u>13 ± 4 yo)</u> | <u>464 (299 cases)</u>                | <u>NA</u> | <u>Self-reported</u> | <u>Milk</u><br><u>Banana</u><br><u>Fried beef</u><br><u>Corn</u><br><u>Cakes</u><br><u>Glycemic index</u><br><u>Fried food</u><br><u>Fatty food</u><br><u>Snacks</u><br><u>Fruits</u> | <u>+</u><br><u>+</u><br><u>+</u><br><u>+</u><br><u>+</u><br><u>0</u><br><u>0</u><br><u>0</u><br><u>0</u><br><u>0</u> |
| <u>Di Landro et al.</u> <sup>25</sup> | <u>20</u><br><u>16</u> | <u>Italy</u>   | <u>Case-control</u>                | <u>Female, (25+ yo)</u>                                            | <u>518 (248 cases)</u>                | <u>NA</u> | <u>Dermatologist</u> | <u>Milk</u><br><u>Dairy products</u><br><u>Starchy foods</u><br><u>Cakes and sweets</u><br><u>Chocolate</u><br><u>Vegetables and fruits</u><br><u>Fish</u><br><u>Beef</u>             | <u>0</u><br><u>0</u><br><u>0</u><br><u>0</u><br><u>=</u><br><u>=</u><br><u>0</u><br><br><br>                         |
| <u>Larosa et al.</u> <sup>26</sup>    | <u>20</u><br><u>16</u> | <u>USA</u>     | <u>Case-control</u>                | <u>Male, female (14 - 19 yo)</u>                                   | <u>225 (120 cases)</u>                | <u>NA</u> | <u>Dermatologist</u> | <u>Dairy products</u>                                                                                                                                                                 | <u>+</u>                                                                                                             |
| <u>Delost et al.</u> <sup>27</sup>    | <u>20</u><br><u>16</u> | <u>USA</u>     | <u>Interventional (randomised)</u> | <u>Male, female (17 - 25 yo)</u>                                   | <u>54 (26 exposed, 28 after swap)</u> | <u>∅</u>  | <u>Dermatologist</u> | <u>Chocolate bar vs. Jelly beans</u>                                                                                                                                                  | <u>+</u>                                                                                                             |

|                                      |                        |                 |                                           |                                                |                              |                |                      |                                                                         |                                  |
|--------------------------------------|------------------------|-----------------|-------------------------------------------|------------------------------------------------|------------------------------|----------------|----------------------|-------------------------------------------------------------------------|----------------------------------|
| <u>Ulvestad et al.</u> <sup>28</sup> | <u>20</u><br><u>16</u> | <u>Norway</u>   | <u>Cohort</u>                             | <u>Male, female (15 - 16, 18 - 19 yo)</u>      | <u>2489</u>                  | <u>Ø</u>       | <u>Self-reported</u> | <u>Dairy products</u>                                                   | <u>±</u>                         |
| <u>Grossi et al.</u> <sup>29</sup>   | <u>20</u><br><u>16</u> | <u>Italy</u>    | <u>Semantic connectivity map approach</u> | <u>Male, female (10 - 24 yo)</u>               | <u>563 (205 cases)</u>       | <u>NA</u>      | <u>Dermatologist</u> | <u>Milk</u><br><u>Cheese</u><br><u>Sweets/cakes</u><br><u>Chocolate</u> | <u>±</u>                         |
| <u>Cerman et al.</u> <sup>30</sup>   | <u>20</u><br><u>16</u> | <u>Turkey</u>   | <u>Cross-sectional</u>                    | <u>Male, female (mean age ± SD, 19 ± 3 yo)</u> | <u>86 (50 cases)</u>         | <u>NA</u>      | <u>Dermatologist</u> | <u>Dietary glycemic load</u><br><u>Milk</u><br><u>Glucose</u>           | <u>±</u><br><u>0</u><br><u>0</u> |
| <u>Burris et al.</u> <sup>31</sup>   | <u>20</u><br><u>17</u> | <u>USA</u>      | <u>Cross-sectional</u>                    | <u>Male, female (18 - 40 yo)</u>               | <u>64 (32 cases)</u>         | <u>NA</u>      | <u>Dermatologist</u> | <u>Glycemic load / glycemic index</u>                                   | <u>+/0</u>                       |
| <u>Aghasi et al.</u> <sup>32</sup>   | <u>20</u><br><u>18</u> | <u>Many</u>     | <u>Meta-analysis</u>                      | <u>14 articles (9 - 30 yo)</u>                 | <u>Ø</u>                     | <u>Ø</u>       | <u>Ø</u>             | <u>Dairy products</u>                                                   | <u>±</u>                         |
| <u>Burris et al.</u> <sup>33</sup>   | <u>20</u><br><u>18</u> | <u>USA</u>      | <u>Interventional (randomized)</u>        | <u>Male, female (18 - 40 yo)</u>               | <u>66 (34 exposed)</u>       | <u>2 weeks</u> | <u>Dermatologist</u> | <u>Low glycemic load and glycemic index diet</u>                        | <u>=</u>                         |
| <u>Juhl et al.</u> <sup>34</sup>     | <u>20</u><br><u>18</u> | <u>Many</u>     | <u>Meta-analysis</u>                      | <u>14 articles (7 - 30 yo)</u>                 | <u>78,529 (23,046 cases)</u> | <u>Ø</u>       | <u>Ø</u>             | <u>Dairy products</u>                                                   | <u>±</u>                         |
| <u>Juhl et al.</u> <sup>35</sup>     | <u>20</u><br><u>18</u> | <u>Danemark</u> | <u>Case-control</u>                       | <u>Male, female from GESUS (20 - 96 yo)</u>    | <u>20,416 (303 cases)</u>    | <u>NA</u>      | <u>Self-reported</u> | <u>Dairy products</u>                                                   | <u>0</u>                         |



|                                         |                        |                             |                                   |                                            |                                       |           |                                 |                                                                                                                                                                                                                             |                                                                                                                                  |
|-----------------------------------------|------------------------|-----------------------------|-----------------------------------|--------------------------------------------|---------------------------------------|-----------|---------------------------------|-----------------------------------------------------------------------------------------------------------------------------------------------------------------------------------------------------------------------------|----------------------------------------------------------------------------------------------------------------------------------|
| <u>Suppiah et al.</u> <sup>36</sup>     | <u>20</u><br><u>18</u> | <u>Malays</u><br><u>ia</u>  | <u>Case-</u><br><u>control</u>    | <u>Male, Female</u><br><u>(14+ yo)</u>     | <u>114 (57 cases)</u>                 | <u>NA</u> | <u>Clinician</u>                | <u>Chocolate</u><br><u>Sweets</u><br><u>Potato chips</u><br><u>Nuts</u><br><u>Yogurt</u><br><u>Ice cream</u><br><u>Carbonated</u><br><u>drink</u><br><u>Milk</u>                                                            | <u>+</u><br><u>0</u><br><u>0</u><br><u>0</u><br><u>0</u><br><u>0</u><br><u>0</u><br><u>+</u>                                     |
| <u>Stewart et al.</u> <sup>37</sup>     | <u>20</u><br><u>18</u> | <u>Austral</u><br><u>ia</u> | <u>Case-</u><br><u>control</u>    | <u>Male, Female</u><br><u>(16+ yo)</u>     | <u>703 (453 cases)</u>                | <u>NA</u> | <u>Clinician</u>                | <u>Vegan diet</u><br><u>Vitamin D</u><br><u>deficiency</u>                                                                                                                                                                  | <u>0</u><br><u>+</u>                                                                                                             |
| <u>Wolkenstein et al.</u> <sup>38</sup> | <u>20</u><br><u>18</u> | <u>Many</u>                 | <u>Cross-</u><br><u>sectional</u> | <u>Male, Female (15</u><br><u>- 24 yo)</u> | <u>10,521 (6,063</u><br><u>cases)</u> | <u>NA</u> | <u>Self-</u><br><u>reported</u> | <u>Milk</u><br><u>Dairy</u><br><u>products</u><br><u>Fruit juice</u><br><u>Sweetened</u><br><u>sodas</u><br><u>Chocolate</u><br><u>Sweets</u><br><u>Ice</u><br><u>cream/sorbet</u><br><u>Pasta/Rice/Se</u><br><u>molina</u> | <u>+</u><br><u>+</u><br><u>0</u><br><u>0</u><br><u>+</u><br><u>+</u><br><u>0</u><br><u>+</u><br><u>+</u><br><u>0</u><br><u>+</u> |

|                                   |                        |              |                        |                                                                    |                          |           |                      |                                                                                                                                                             |                                                          |
|-----------------------------------|------------------------|--------------|------------------------|--------------------------------------------------------------------|--------------------------|-----------|----------------------|-------------------------------------------------------------------------------------------------------------------------------------------------------------|----------------------------------------------------------|
| <u>Huang et al.</u> <sup>39</sup> | <u>20</u><br><u>19</u> | <u>China</u> | <u>Cross-sectional</u> | <u>Male, Female</u><br><u>(mean age ± SD,</u><br><u>18 ± 1 yo)</u> | <u>8,197 (833 cases)</u> | <u>NA</u> | <u>Dermatologist</u> | <u>Daily water intake except drinks</u><br><u>Carbonated soda</u><br><u>Sweetened tea drinks</u><br><u>Fruit-flavored drinks</u><br><u>Alcohol drinking</u> | <u>0</u><br><u>+</u><br><u>+</u><br><u>+</u><br><u>0</u> |
|-----------------------------------|------------------------|--------------|------------------------|--------------------------------------------------------------------|--------------------------|-----------|----------------------|-------------------------------------------------------------------------------------------------------------------------------------------------------------|----------------------------------------------------------|

*Abbreviations; yo: years old; -: negative association; +: positive association; 0: no association; Ø lack of data; NA: not appropriate  
Bibliographic research done between January 2019 – February 2019 for the periode 2005 – February 2019, using the following words combination: acne AND (diet OR nutrition OR dietary) ; acne AND chocolate; acne and (dairy OR milk), in Pubmed.*

## eReferences

1. Hercberg, S. *et al.* The Nutrinet-Santé Study: a web-based prospective study on the relationship between nutrition and health and determinants of dietary patterns and nutritional status. *BMC Public Health* **10**, (2010).
2. Phan, C. *et al.* Association Between Mediterranean Anti-inflammatory Dietary Profile and Severity of Psoriasis: Results From the NutriNet-Santé Cohort. *JAMA Dermatol.* **154**, 1017 (2018).
3. Srour, B. *et al.* Ultraprocessed Food Consumption and Risk of Type 2 Diabetes Among Participants of the NutriNet-Santé Prospective Cohort. *JAMA Intern. Med.* **180**, 283 (2020).
4. Srour, B. *et al.* Ultra-processed food intake and risk of cardiovascular disease: prospective cohort study (NutriNet-Santé). *BMJ* 11451 (2019) doi:10.1136/bmj.11451.
5. Adebamowo, C. A. *et al.* High school dietary dairy intake and teenage acne. *J. Am. Acad. Dermatol.* **52**, 207–214 (2005).
6. Adebamowo, C. A. *et al.* Milk consumption and acne in adolescent girls. *Dermatol. Online J.* **12**, 1 (2006).
7. Kaymak, Y. *et al.* Dietary glycemic index and glucose, insulin, insulin-like growth factor-I, insulin-like growth factor binding protein 3, and leptin levels in patients with acne. *J. Am. Acad. Dermatol.* **57**, 819–823 (2007).
8. Smith, R. N., Mann, N. J., Braue, A., Mäkeläinen, H. & Varigos, G. A. A low-glycemic-load diet improves symptoms in acne vulgaris patients: a randomized controlled trial. *Am. J. Clin. Nutr.* **86**, 107–115 (2007).
9. Adebamowo, C. A. *et al.* Milk consumption and acne in teenaged boys. *J. Am. Acad. Dermatol.* **58**, 787–793 (2008).
10. Zahra Ghodsi, S., Orawa, H. & Zouboulis, C. C. Prevalence, Severity, and Severity Risk Factors of Acne in High School Pupils: A Community-Based Study. *J. Invest. Dermatol.* **129**, 2136–2141 (2009).
11. Kim, J. *et al.* Dietary effect of lactoferrin-enriched fermented milk on skin surface lipid and clinical improvement of acne vulgaris. *Nutrition* **26**, 902–909 (2010).
12. Reynolds, R. C. *et al.* Effect of the Glycemic Index of Carbohydrates on Acne vulgaris. *Nutrients* **2**, 1060–1072 (2010).
13. Koku Aksu, A. E. *et al.* Acne: prevalence and relationship with dietary habits in Eskisehir, Turkey: Acne prevalence and dietary habits. *J. Eur. Acad. Dermatol. Venereol.* no-no (2011) doi:10.1111/j.1468-3083.2011.04329.x.

14. Block, S. G. *et al.* Exacerbation of facial acne vulgaris after consuming pure chocolate. *J. Am. Acad. Dermatol.* **65**, e114–e115 (2011).
15. Di Landro, A. *et al.* Family history, body mass index, selected dietary factors, menstrual history, and risk of moderate to severe acne in adolescents and young adults. *J. Am. Acad. Dermatol.* **67**, 1129–1135 (2012).
16. Ismail, N. H., Manaf, Z. A. & Azizan, N. Z. High glyceemic load diet, milk and ice cream consumption are related to acne vulgaris in Malaysian young adults: a case control study. *BMC Dermatol.* **12**, 13 (2012).
17. Kwon, H. H. *et al.* Clinical and histological effect of a low glycaemic load diet in treatment of acne vulgaris in Korean patients: a randomized, controlled trial. *Acta Derm. Venereol.* **92**, 241–246 (2012).
18. Salomone, C., Navarrete-Dechent, C., Pérez-Cotapos, M., Nicklas, C. & Droppelmann, K. Comparative study of dietary habits between acne patients and a healthy cohort. *Indian J. Dermatol. Venereol. Leprol.* **78**, 99 (2012).
19. Wolkenstein, P. *et al.* Smoking and Dietary Factors Associated with Moderate-to-Severe Acne in French Adolescents and Young Adults: Results of a Survey Using a Representative Sample. *Dermatology* **230**, 34–39 (2015).
20. Caperton, C., Block, S., Viera, M., Keri, J. & Berman, B. Double-blind, Placebo-controlled Study Assessing the Effect of Chocolate Consumption in Subjects with a History of Acne Vulgaris. *J. Clin. Aesthetic Dermatol.* **7**, 19–23 (2014).
21. Cao, H. *et al.* Complementary therapies for acne vulgaris. *Cochrane Database Syst. Rev.* (2015) doi:10.1002/14651858.CD009436.pub2.
22. El Darouti, M. A. *et al.* Salty and spicy food; are they involved in the pathogenesis of acne vulgaris? A case controlled study. *J. Cosmet. Dermatol.* **15**, 145–149 (2016).
23. Vongraviopap, S. & Asawanonda, P. Dark chocolate exacerbates acne. *Int. J. Dermatol.* **55**, 587–591 (2016).
24. Okoro, E. O., Ogunbiyi, A. O., George, A. O. & Subulade, M. O. Association of diet with acne vulgaris among adolescents in Ibadan, southwest Nigeria. *Int. J. Dermatol.* **55**, 982–988 (2016).
25. Di Landro, A. *et al.* Adult female acne and associated risk factors: Results of a multicenter case-control study in Italy. *J. Am. Acad. Dermatol.* **75**, 1134–1141.e1 (2016).
26. LaRosa, C. L. *et al.* Consumption of dairy in teenagers with and without acne. *J. Am. Acad. Dermatol.* **75**, 318–322 (2016).

27. Delost, G. R., Delost, M. E. & Lloyd, J. The impact of chocolate consumption on acne vulgaris in college students: A randomized crossover study. *J. Am. Acad. Dermatol.* **75**, 220–222 (2016).
28. Ulvestad, M., Bjertness, E., Dalgard, F. & Halvorsen, J. A. Acne and dairy products in adolescence: results from a Norwegian longitudinal study. *J. Eur. Acad. Dermatol. Venereol.* **31**, 530–535 (2017).
29. Grossi, E. *et al.* The constellation of dietary factors in adolescent acne: a semantic connectivity map approach. *J. Eur. Acad. Dermatol. Venereol.* **30**, 96–100 (2016).
30. Çerman, A. A. *et al.* Dietary glyceemic factors, insulin resistance, and adiponectin levels in acne vulgaris. *J. Am. Acad. Dermatol.* **75**, 155–162 (2016).
31. Burris, J., Rietkerk, W., Shikany, J. M. & Woolf, K. Differences in Dietary Glycemic Load and Hormones in New York City Adults with No and Moderate/Severe Acne. *J. Acad. Nutr. Diet.* **117**, 1375–1383 (2017).
32. Aghasi, M. *et al.* Dairy intake and acne development: A meta-analysis of observational studies. *Clin. Nutr.* (2018) doi:10.1016/j.clnu.2018.04.015.
33. Burris, J., Shikany, J. M., Rietkerk, W. & Woolf, K. A Low Glycemic Index and Glycemic Load Diet Decreases Insulin-like Growth Factor-1 among Adults with Moderate and Severe Acne: A Short-Duration, 2-Week Randomized Controlled Trial. *J. Acad. Nutr. Diet.* **118**, 1874–1885 (2018).
34. Juhl, C. R. *et al.* Dairy Intake and Acne Vulgaris: A Systematic Review and Meta-Analysis of 78,529 Children, Adolescents, and Young Adults. *Nutrients* **10**, (2018).
35. Juhl, C. *et al.* Lactase Persistence, Milk Intake, and Adult Acne: A Mendelian Randomization Study of 20,416 Danish Adults. *Nutrients* **10**, 1041 (2018).
36. Suppiah T. S. S. *et al.* Acne vulgaris and its association with dietary intake: a Malaysian perspective. *Asia Pac. J. Clin. Nutr.* **27**, 1141–1145 (2018).
37. Stewart, T. J. & Bazergy, C. Hormonal and dietary factors in acne vulgaris versus controls. *Dermatoendocrinol.* **10**, e1442160 (2018).
38. Wolkenstein, P. *et al.* Acne prevalence and associations with lifestyle: a cross-sectional online survey of adolescents/young adults in 7 European countries. *J. Eur. Acad. Dermatol. Venereol.* **32**, 298–306 (2018).
39. Huang, X. *et al.* Daily Intake of Soft Drinks and Moderate-to-Severe Acne Vulgaris in Chinese Adolescents. *J. Pediatr.* **204**, 256–262.e3 (2019).
